# Supplementary material
Source: Elsevier journal article supplement (https://www.sciencedirect.com/science/article/pii/S2173572718301176)
Supplement: mmc1 [file S2173572718301176:mmc1.pdf]

## **ANEXO I**

### **CUESTIONARIO**

Consta de 7 apartados. El formato de las respuestas se adecúa a la pregunta y se expresa entre corchetes. Se ha diseñado un sistema de encuesta en cascada que evita preguntas improcedentes y minimiza la posibilidad de respuestas antagónicas.

#### **1. Nombre del Hospital [texto abierto]**

#### **2. ¿Qué cargo ocupa? [Lista opciones excluyentes]**

Supervisor / Enfermera / Facultativo

¿Cuántos años de experiencia tiene? [texto abierto]

#### **3. Número de camas de la UCI [texto abierto]**

Tipo de asistencia [Lista opciones múltiples]

Patología médica / Unidad coronaria / Atención postquirúrgica / Electroestimulación definitiva / Trasplante de órganos / Unidad de quemados / Traumatismos

¿Qué tipo de gráfica se emplea en su UCI? [Lista opciones excluyentes]

Gráfica de papel / Gráfica informatizada

#### **4. ¿En su UCI se recoge la talla de los pacientes? [Lista opciones excluyentes]**

Sí, por protocolo / A petición facultativa / Sólo en algunas patologías concretas / No se recoge

¿En qué tipo de pacientes se recoge la talla? [texto abierto]

¿En su UCI se recoge el peso de los pacientes? [Lista opciones excluyentes]

Sí, por protocolo / A petición facultativa / Sólo en algunas patologías concretas / No se recoge

El protocolo que regula la toma de medidas es [Lista opciones excluyentes]

Un protocolo exclusivo de antropometría / El protocolo de cálculos nutricionales / El protocolo de recogida de datos al ingreso.

¿Cuál es la frecuencia de recogida del peso que indica el protocolo? [Lista opciones múltiples]

Al ingreso / A diario / Semanal / A petición facultativa / No estoy seguro.

¿Piensa que contestar a este cuestionario influirá en su actitud frente al protocolo existente en su UCI? [Likert 5 grados]

1. Totalmente en desacuerdo – 5. Totalmente de acuerdo

Si el peso se recoge solo en determinados pacientes ¿En qué tipo de pacientes se recoge el peso? [Lista opciones múltiples]

Pacientes en diálisis / Resucitados con gran volumen de fluidos / Quemados / Pacientes con amputación de miembros / Trasplantados / Donantes de órganos / Otros: [texto abierto]

¿Piensa que contestar a este cuestionario influirá en que se genere un protocolo de medición antropométrica? [Likert 5 grados]

1. Totalmente en desacuerdo – 5. Totalmente de acuerdo

**5. Si se precisa determinar el peso de un paciente su UCI ¿qué método se emplea? [Lista opciones múltiples]**

Medidas estimadas por el personal / Medidas declaradas por el paciente o su familia /

Herramientas de medición antropométrica / Medidas reflejadas en la historia clínica

**6. Indique de qué herramientas de pesado dispone, aunque no se usen [Lista opciones múltiples]**

Grúa con báscula / Pesa-camas con calzas / Cama con báscula incluida / Báscula de pie / No dispongo de ninguna herramienta de pesado

Si precisa determinar la talla de un paciente tu UCI ¿qué método se emplea? [Lista opciones múltiples]

Medidas estimadas por el personal / Medidas declaradas por el paciente o su familia /

Herramientas de medición antropométrica / Medidas reflejadas en la historia clínica

Indique las herramientas de medida de la talla de las que dispones, aunque no se usen [Lista opciones múltiples]

Tallímetro cuando puedan levantarse / Medición con cinta métrica de cabeza a pies / Medición de un segmento corporal (ej. longitud tibia) / No dispongo de ninguna herramienta

**7. La medición de peso y talla se utilizan ampliamente en su UCI para la toma decisiones terapéuticas [Likert 5 grados]**

1. Totalmente en desacuerdo – 5. Totalmente de acuerdo

Existe diferencia significativa entre las medidas estimadas visualmente y las reales [Likert 5 grados]

1. Totalmente en desacuerdo – 5. Totalmente de acuerdo

Conocer el peso y la talla de un paciente influye en el coste total que genera su ingreso en UCI [Likert 5 grados]

1. Totalmente en desacuerdo – 5. Totalmente de acuerdo

Disponer de medidas reales en vez de estimadas afecta a la seguridad de un paciente ingresado en UCI [Likert 5 grados]

1. Totalmente en desacuerdo – 5. Totalmente de acuerdo

El balance hídrico diario recogido en la gráfica de enfermería es una medida fiable [Likert 5 grados]

1. Totalmente en desacuerdo – 5. Totalmente de acuerdo
